# Supplementary material
Source: PubMed Central journal article supplement (PMC10074961)
Supplement: mmc1.pdf [file mmc1.pdf]

### Partial atomic charges of quercetin

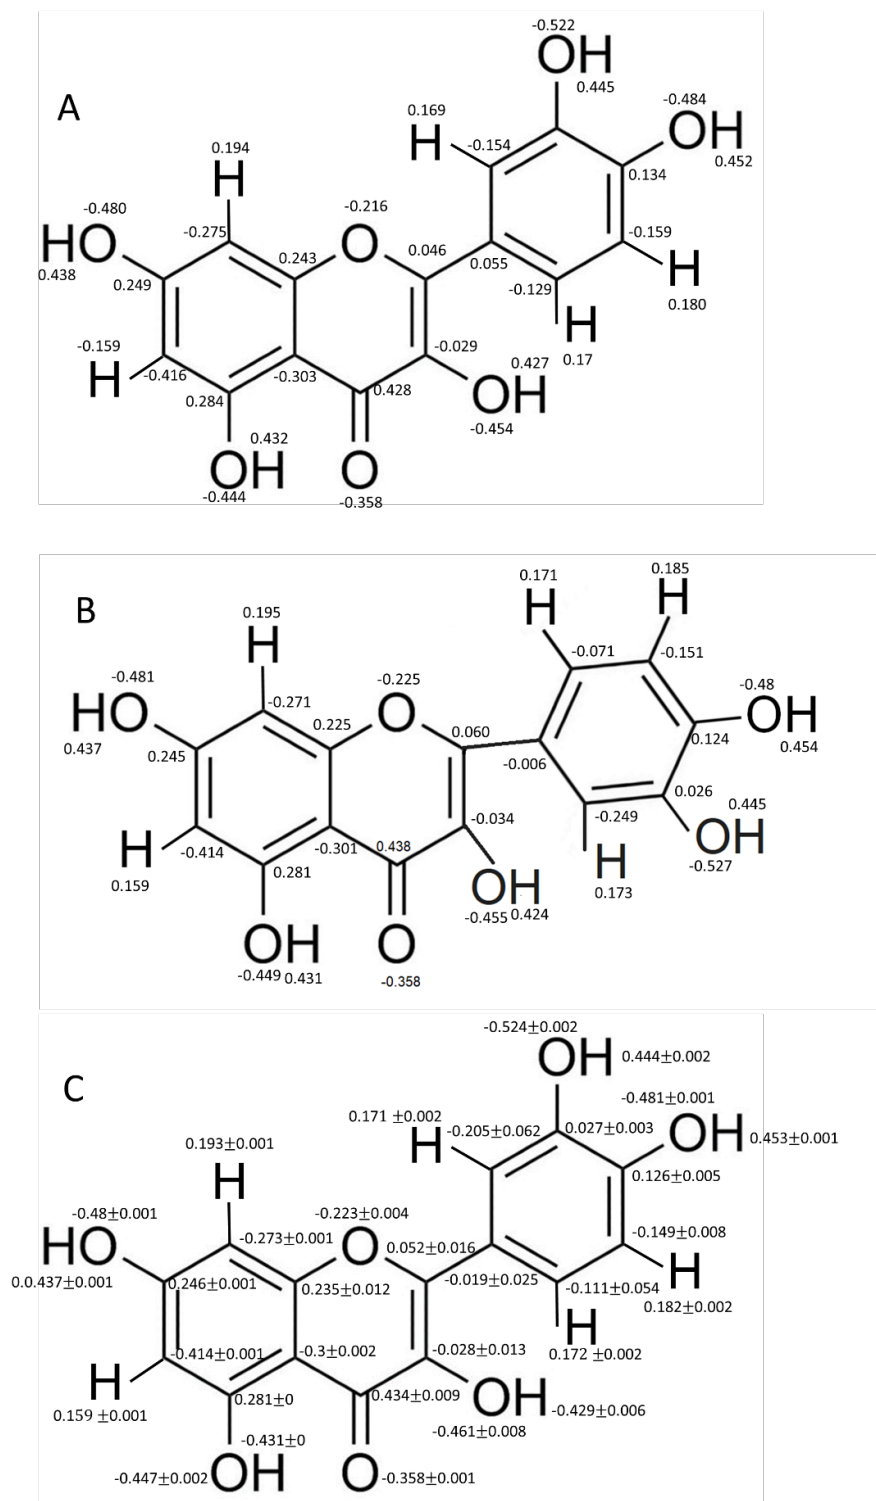

Figure S1. Partial atomic charges of quercetin in configuration A and B. Panel C shows the average value, that was used in the present study.
